# Supplementary material for: Ultra-stable CsPbBr3@PbBrOH nanorods for fluorescence labeling application based on methylimidazole-assisted synthesis
Source: Royal Society of Chemistry journal article supplement (doi:10.1039/d2tb02502g), 2023-01-01
Supplement: d2tb02502g1.pdf [file d2tb02502g1.pdf]

**Supplementary Information for**  
**Ultra-stable CsPbBr<sub>3</sub>@PbBrOH nanorods for fluorescent labeling**  
**application based on methylimidazole-assisted synthesis**

*Jie Guan<sup>a</sup>, Dandan Yang<sup>a\*</sup>, Junyi Ma<sup>a</sup>, Yingzhuo Shen<sup>a</sup>, Qin Xu<sup>a\*</sup>, Xiaoya Hu<sup>a</sup>*

<sup>a</sup>School of Chemistry and Chemical Engineering, Yangzhou University,

Yangzhou 225002, China;

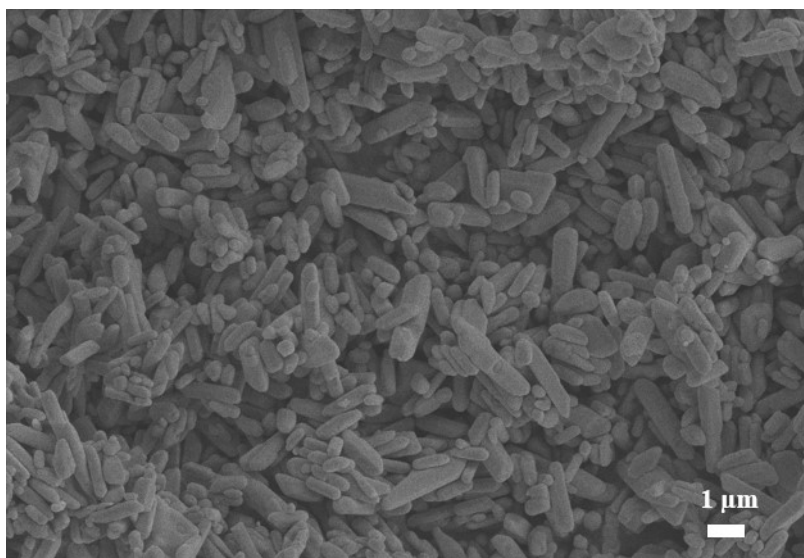

Figure S1 SEM images of CsPbBr<sub>3</sub>@PbBrOH nanorods.

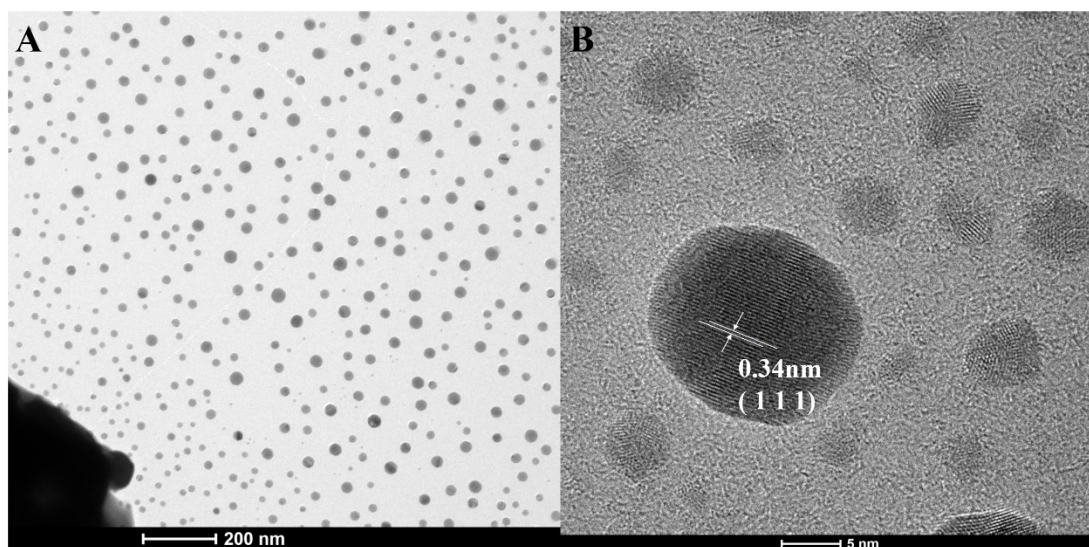

Figure S2 (A) TEM and (B) HRTEM images of CsPbBr<sub>3</sub>@PbBrOH nanorods with the focused electron beam hit for a long time.

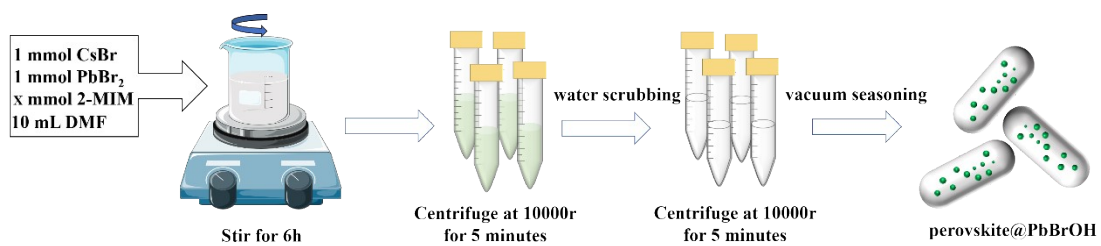

Figure S3 The synthesis process of perovskite@PbBrOH nanorods.

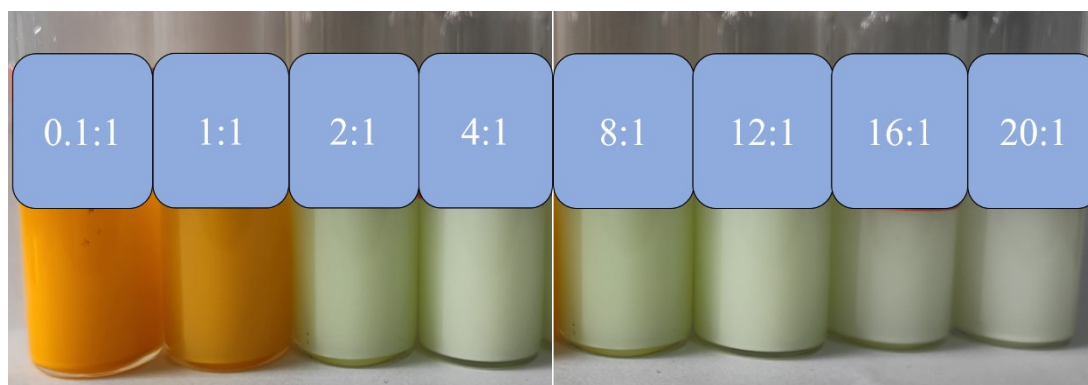

Figure S4 The photographs of the products in DMF after the reaction.

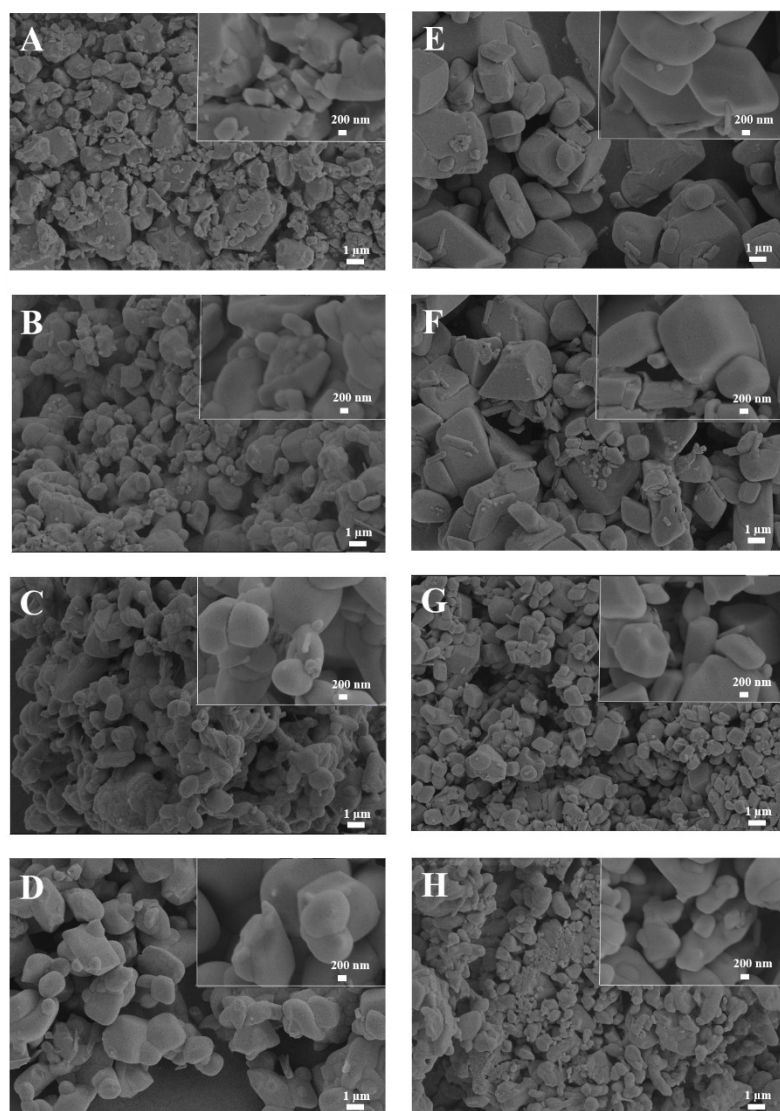

Figure S5 (A-H) SEM images of intermediate prepared with the molar ratio of 2-MIM to  $\text{PbBr}_2$  of 0.1:1, 1:1, 2:1, 4:1, 8:1, 12:1, 16:1 and 20:1, respectively (Insets are SEM images at higher magnifications).

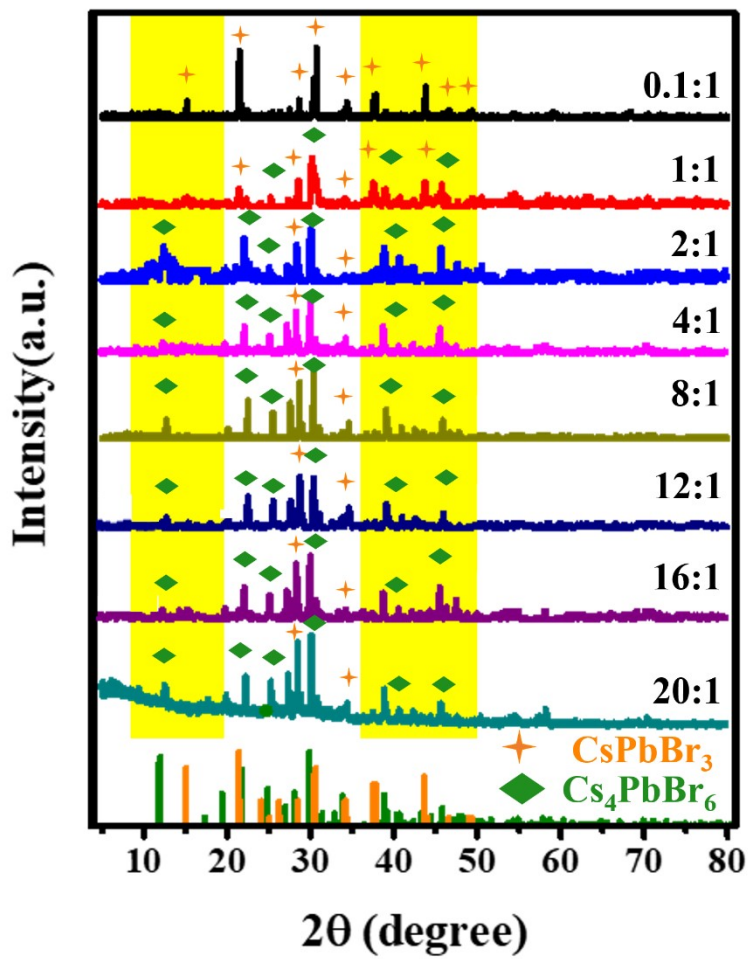

Figure S6 XRD patterns of intermediate prepared with the molar ratio of 2-MIM to  $\text{PbBr}_2$  of 0.1:1, 1:1, 2:1, 4:1, 8:1, 12:1, 16:1 and 20:1, respectively.

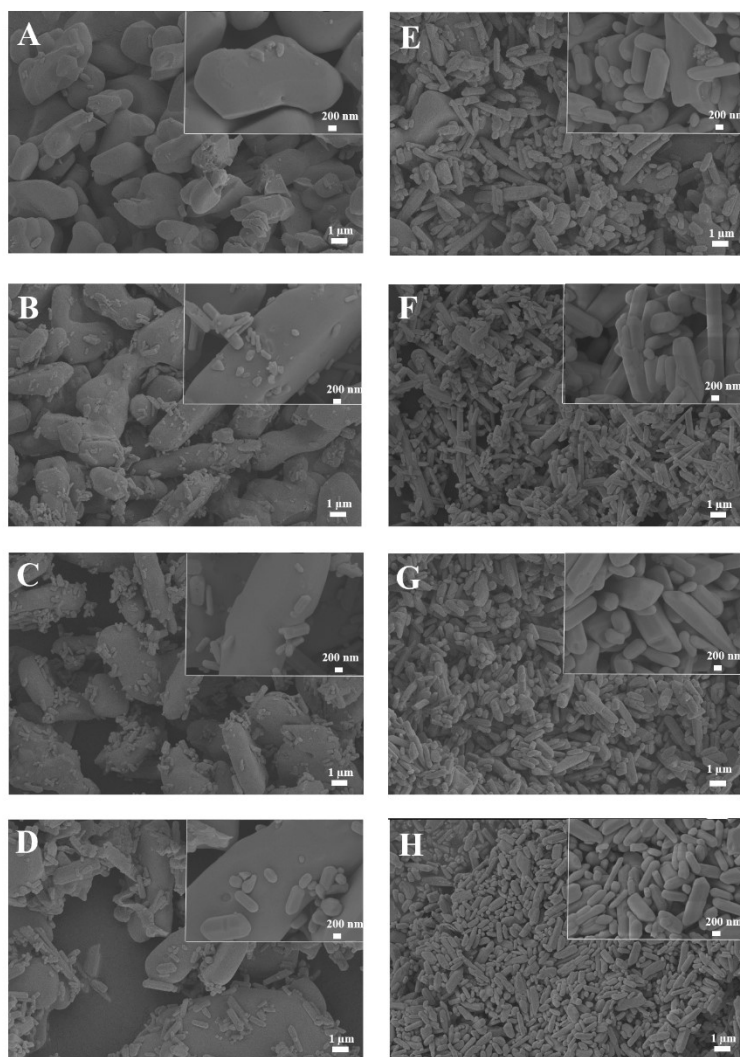

Figure S7 (A-H) SEM images of final products prepared with the molar ratio of 2-MIM to  $\text{PbBr}_2$  of 0.1:1, 1:1, 2:1, 4:1, 8:1, 12:1, 16:1 and 20:1, respectively (Insets are SEM images at higher magnifications).

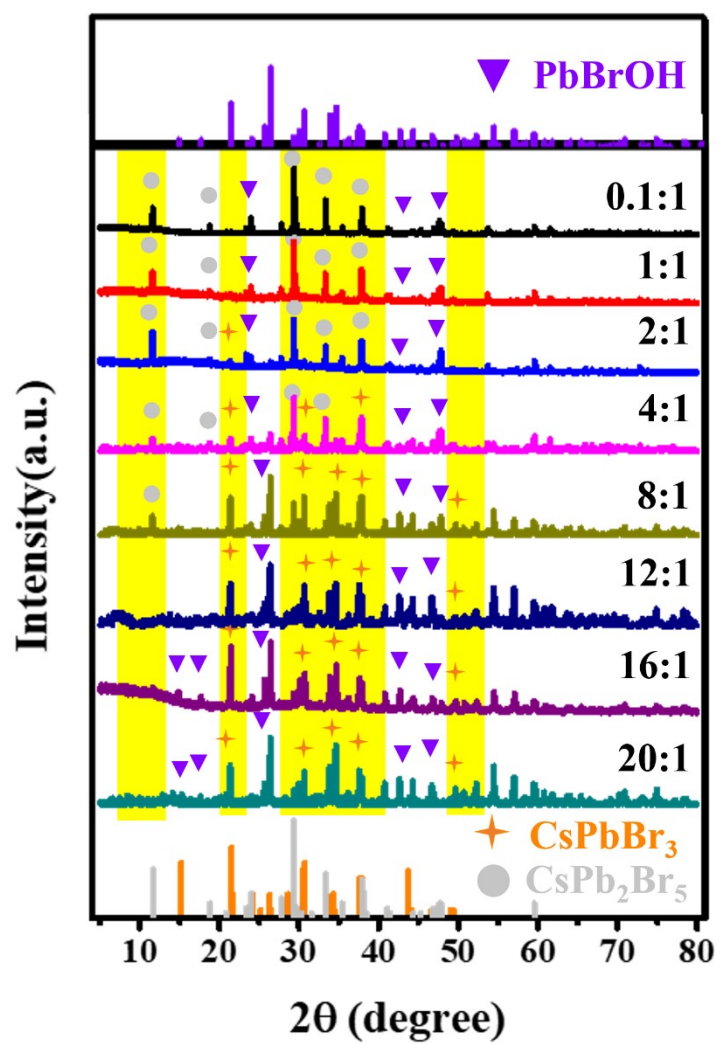

Figure S8 XRD patterns of final products prepared with the molar ratio of 2-MIM to  $\text{PbBr}_2$  of 0.1:1, 1:1, 2:1, 4:1, 8:1, 12:1, 16:1 and 20:1, respectively.

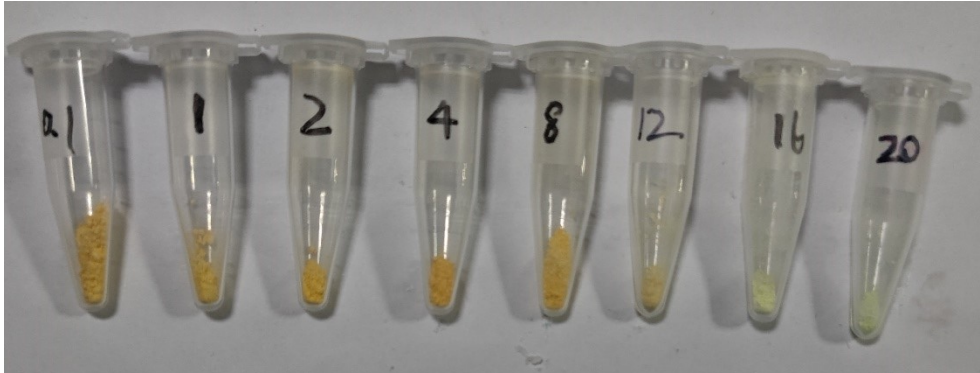

Figure S9 The photographs of the final products under visible light.



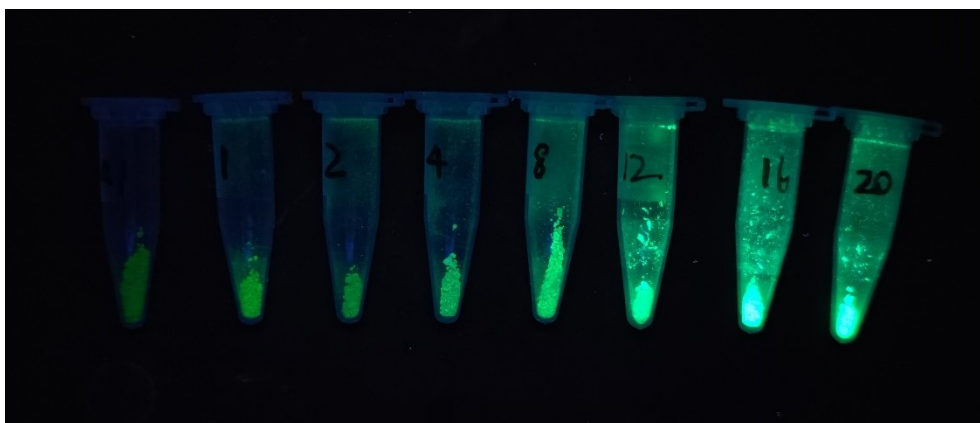

Figure S10 The photographs of the final products under UV light.

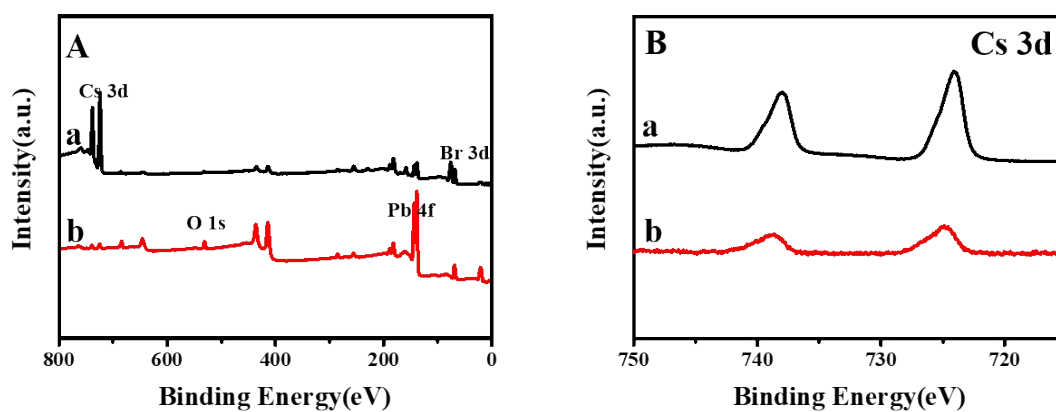

Figure S11 (A) XPS survey spectra of composites before (curve a) and after (curve b) treated by water. (B) High-resolution XPS spectrum of Cs 3d of composites before (curve a) and after (curve b) treated by water.

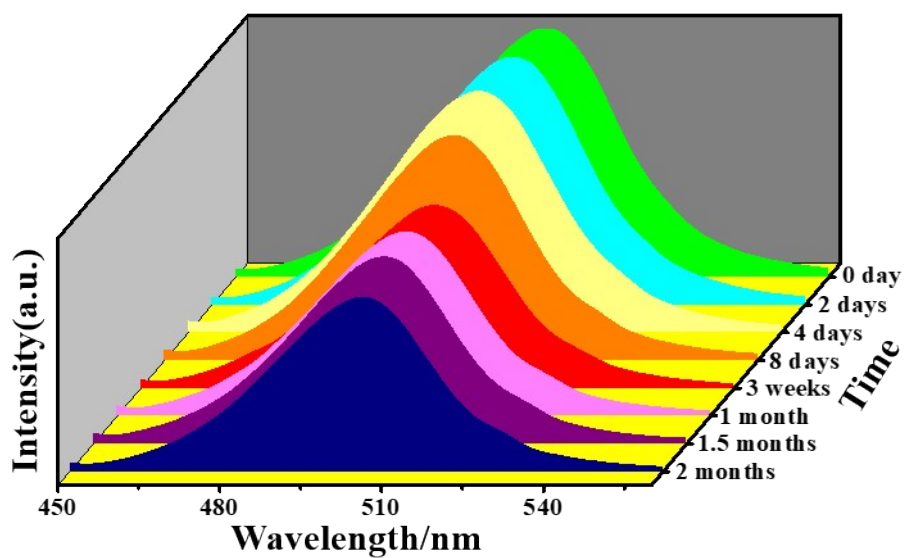

Figure S12 Temporal evolution of PL spectra of CsPbBr<sub>3</sub>@PbBrOH kept in water.

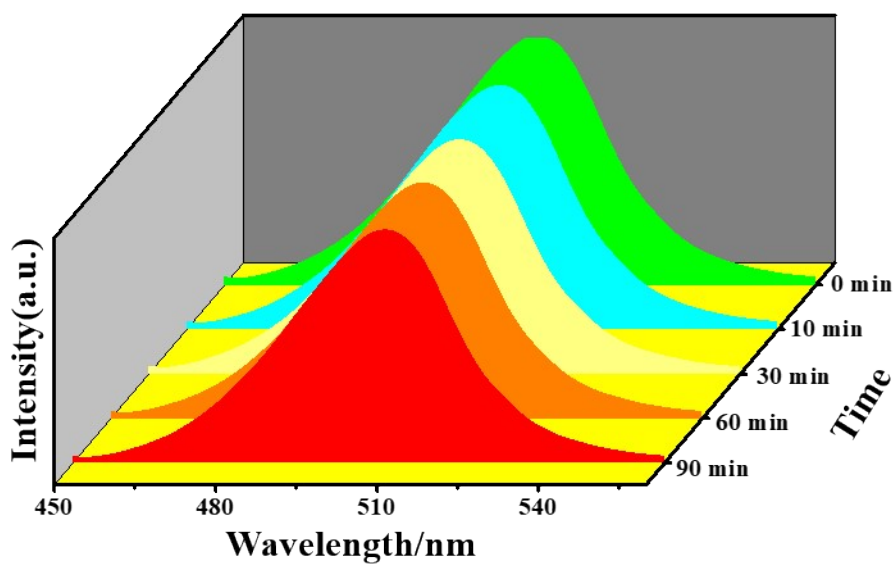

Figure S13 Temporal evolution of PL spectra of CsPbBr<sub>3</sub>@PbBrOH under ultrasonication.

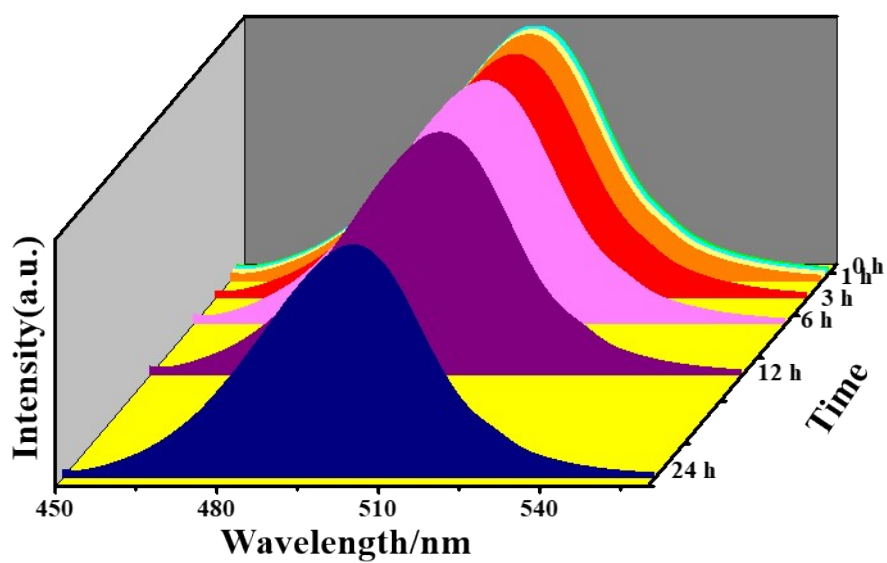

Figure S14 Temporal evolution of PL spectra of CsPbBr<sub>3</sub>@PbBrOH under 365 nm irradiation.

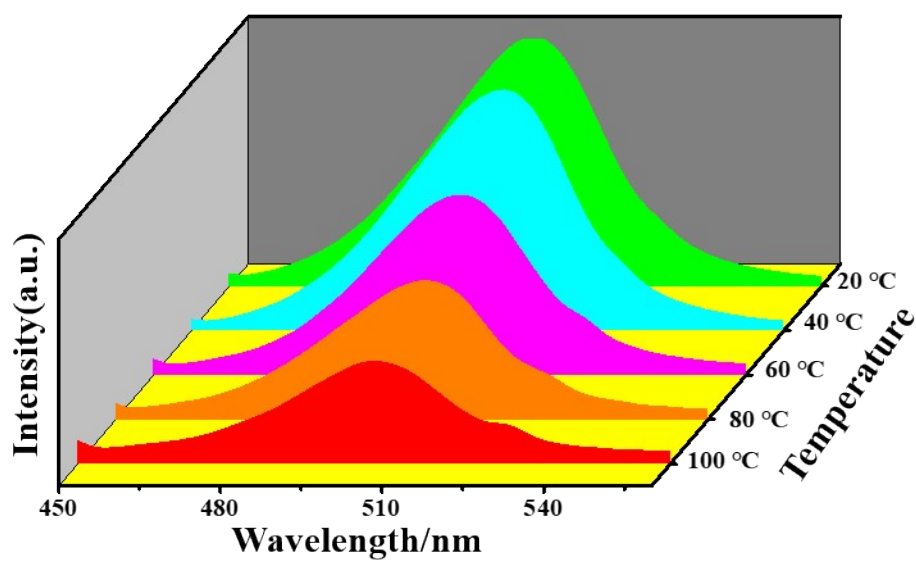

Figure S15 Temperature evolution of PL spectra of CsPbBr<sub>3</sub>@PbBrOH.

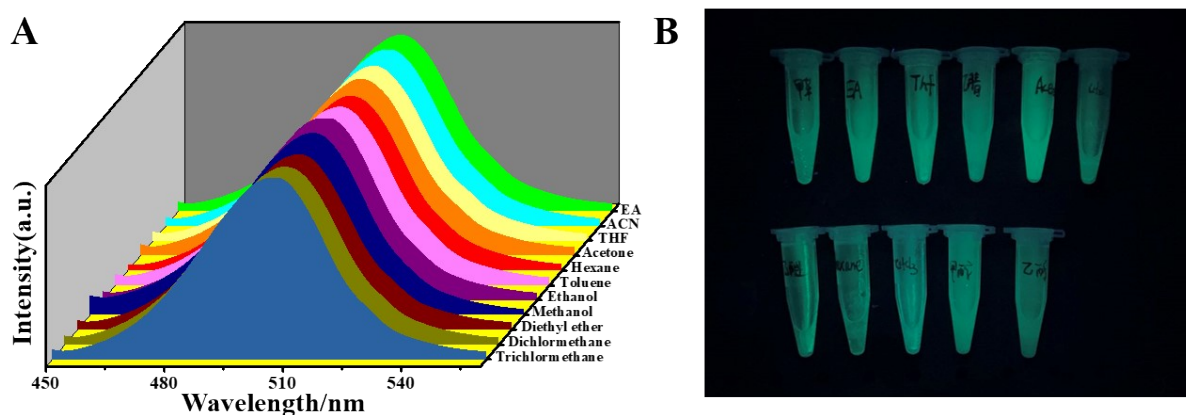

Figure S16 (A) The PL spectra of the CsPbBr<sub>3</sub>@PbBrOH immersed in different solvents. (B) The digital photographs of CsPbBr<sub>3</sub>@PbBrOH nanorods immersed in different solvents under 365 nm UV lamp.

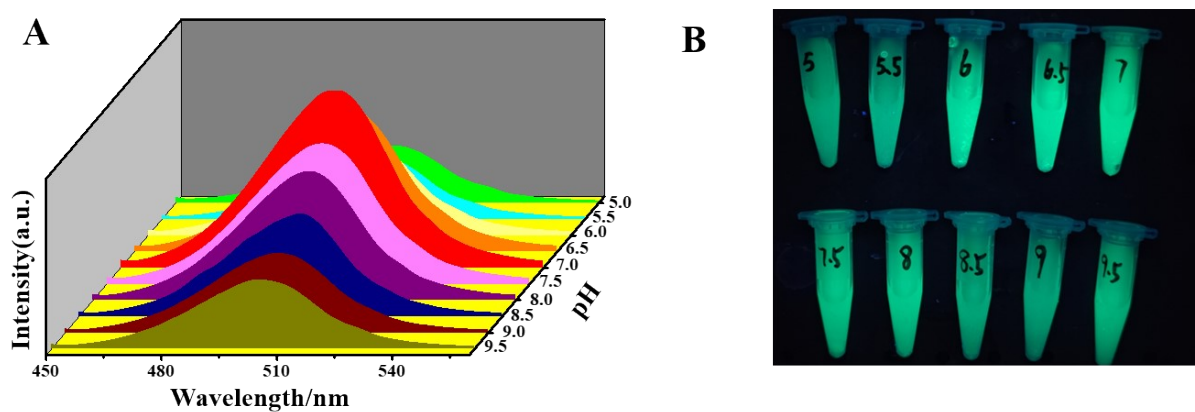

Figure S17 (A) The PL spectra of the CsPbBr<sub>3</sub>@PbBrOH immersed in PBS of different pH. (B) The digital photographs of CsPbBr<sub>3</sub>@PbBrOH nanorods immersed in PBS solution of different pH under 365 nm UV lamp after 1h.

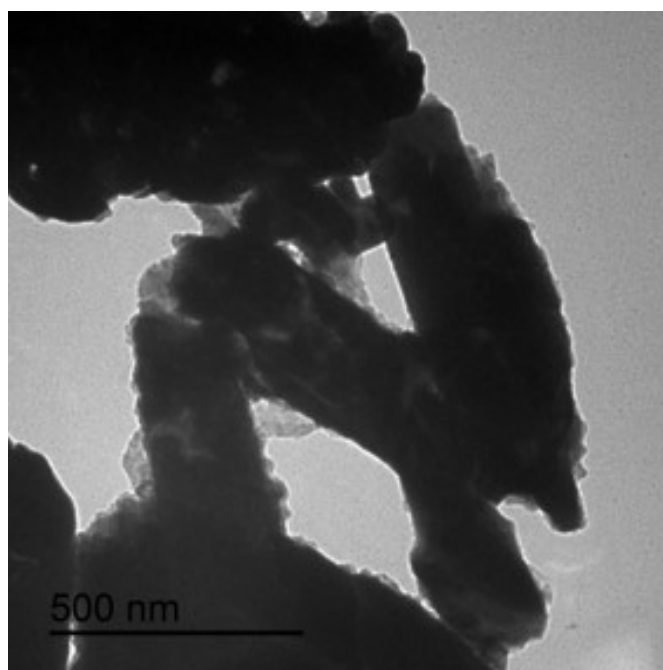

Figure S18. TEM images of CsPbBr<sub>3</sub>@PbBrOH@PDA.

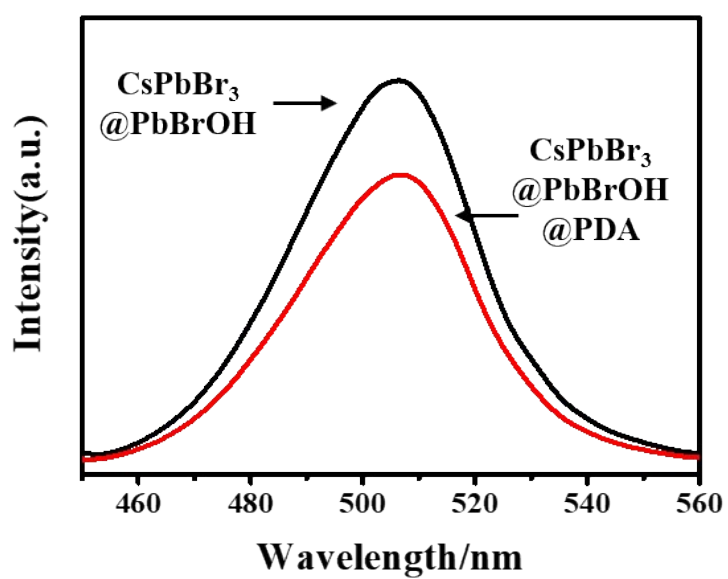

Figure S19. The PL spectra of the CsPbBr<sub>3</sub>@PbBrOH and CsPbBr<sub>3</sub>@PbBrOH@PDA.

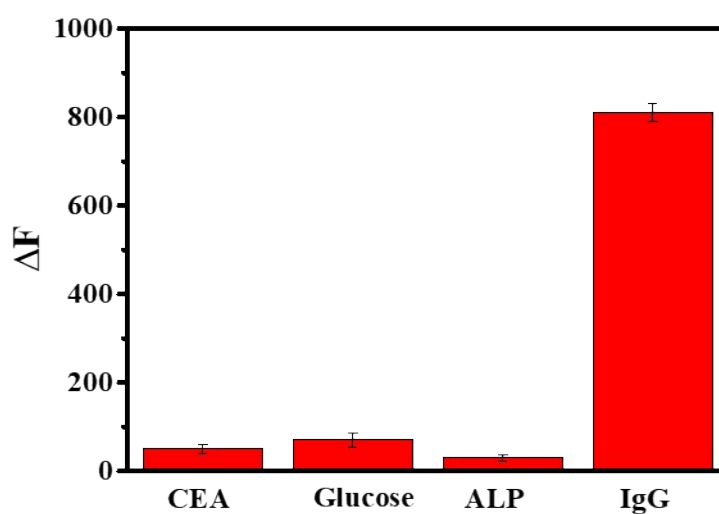

Figure S20. Investigation of the selectivity of sandwich FLISA.

Table S1 Atomic ratios of Cs, Pb and Br elements of the composites characterized by XPS.

| Sample                                                 | Cs (At%) | Br (At%) | Pb (At%) | Br/Pb |
|--------------------------------------------------------|----------|----------|----------|-------|
| CsPbBr <sub>3</sub> /Cs <sub>4</sub> PbBr <sub>6</sub> | 35.1     | 36.77    | 6.56     | 5.70  |
| CsPbBr <sub>3</sub> @PbBrOH                            | 1.84     | 27.33    | 22.04    | 1.24  |

Table S2 Recovery Test of IgG by the FLISA (n = 5)

| Sample | Added (ng/mL) | Found (ng/mL) | Recovery (%) | RSD (%) |
|--------|---------------|---------------|--------------|---------|
| -      | -             | 5.81          | -            | -       |
| 1      | 5             | 10.78±0.16    | 99.40        | 3.21    |
| 2      | 25            | 31.18±0.34    | 101.48       | 1.35    |
| 3      | 50            | 56.13±0.86    | 100.64       | 1.71    |

Table S3 Comparison of analytical performances of different methods used for the determination of IgG.

| Materials used                        | Method applied   | LOD (ng/mL) | Refs      |
|---------------------------------------|------------------|-------------|-----------|
| Ti <sub>3</sub> C <sub>2</sub> -MXene | LRSPR            | 75          | [1]       |
| gold nanorod                          | SPR              | 4.6         | [2]       |
| Y-shaped peptides                     | Electrochemistry | 0.032       | [3]       |
| MoS <sub>2</sub> @N-GQDs-IL           | Electrochemistry | 0.02        | [4]       |
| CuS                                   | ELISA            | 0.15        | [5]       |
| quantum dot nanobeads                 | FLISA            | 0.004       | [6]       |
| CsPbBr <sub>3</sub> @PbBrOH           | FLISA            | 0.003       | This work |

#### References

- [1] X. Zhao, Y. Zhang, X. Wang, P. Ma, D. Song, Y. Sun, *Anal. Bioanal. Chem.* 2022, 414, 2355.
- [2] F. Xia, H. Song, Y. Zhao, W.-M. Zhao, Q. Wang, X.-Z. Wang, B.-T. Wang, Z.-X. Dai, *Measurement* 2020, 164.
- [3] M. Chen, Z. Song, R. Han, Y. Li, X. Luo, *Biosens. Bioelectron.* 2021, 178, 113016.
- [4] A. Axin Liang, B. Huipeng Hou, C. Shanshan Tang, D. Liquan Sun, E. Aiqin Luo, *Bioelectrochemistry* 2021, 137, 107671.
- [5] F. Cheng, Z. Chen, Z. Zhang, L. Chen, *Analyst* 2016, 141, 1918.
- [6] J. Guo, Y. Wang, S. Niu, H. Li, Y. Tian, S. Yu, F. Yu, Y. Wu, L. E. Liu, *ACS Omega* 2020, 5, 23229.
